# Supplementary material for: Feasibility of Fluid Responsiveness Assessment in Patients at Risk for Increased Intracranial Pressure
Source: MDPI journal article supplement (doi:10.3390/jcm13061786), 2024-03-20
Supplement: s1 [file s1]

| Parameter                        | Baseline           | Test               | Reassessment       |
|----------------------------------|--------------------|--------------------|--------------------|
| <b>PLR test (acute stage)</b>    |                    |                    |                    |
| ICP (mmHg)                       | 7.2 (3.7 – 8.3)    | 14.0 (8.4 – 16.6)  | 6.5 (2.5 – 10.0)   |
| CPP (mmHg)                       | 81.8 (65.7 – 89.3) | 82.4 (67.4 – 89.1) | 82.0 (67.9 – 89.5) |
| <b>PLR test (subacute stage)</b> |                    |                    |                    |
| ICP (mmHg)                       | 6.3 (3.6 – 8.4)    | 13.0 (10.5 – 15.4) | 6.0 (4.0 – 8.1)    |
| CPP (mmHg)                       | 87.4 (80.0 – 91.9) | 86.7 (78.5 – 91.0) | 86.9 (81.0 – 92.2) |
| <b>EEO test (acute stage)</b>    |                    |                    |                    |
| ICP (mmHg)                       | 5.1 (1.7 – 7.2)    | 7.5 (3.8 – 10.4)   | 4.9 (1.5 – 7.2)    |
| CPP (mmHg)                       | 84.7 (70.5 – 88.3) | 84.5 (68.6 – 90.1) | 85.8 (71.2 – 90.8) |
| <b>EEO test (subacute stage)</b> |                    |                    |                    |
| ICP (mmHg)                       | 5.9 (2.7 – 6.6)    | 8.7 (5.2 – 10.2)   | 5.8 (3.6 – 7.6)    |
| CPP (mmHg)                       | 88.0 (80.9 – 91.0) | 87.6 (80.3 – 90.7) | 87.2 (80.0 – 92.6) |
| <b>PLR test</b>                  |                    |                    |                    |
| ICP (mmHg)                       | 6.4 (3.9 – 8.4)    | 13.2 (10.5 – 16.0) | 6.05 (3.4 – 8.5)   |
| ICP change score (mmHg)          |                    | 7.3 (5.1 – 8.5)    | -0.2 (-0.6 – 0.2)  |
| ICP difference (mmHg)            |                    |                    | 0.2 (-0.2 – 0.6)   |
| CPP (mmHg)                       | 86.6 (78.3 – 91.1) | 86.0 (75.5 – 89.5) | 86.5 (77.0 – 90.7) |
| CPP change score (mmHg)          |                    | -1.6 (-4.6 – 2.9)  | 0.2 (-0.8 – 1.8)   |
| CPP difference (mmHg)            |                    |                    | -0.2 (-1.8 – 0.8)  |
| Systolic blood pressure (mmHg)   | 131 (126 – 136)    | 145 (136 – 148)    | 132 (126 – 137)    |
| Mean blood pressure (mmHg)       | 92 (85 – 97)       | 98 (92 – 103)      | 92 (87 – 97)       |
| Diastolic blood pressure (mmHg)  | 72 (65 – 77)       | 75 (71 – 80)       | 72 (67 – 76)       |
| Heart rate (min <sup>-1</sup> )  | 66 (60 – 73)       | 66 (62 – 73)       | 65 (60 – 73)       |
| etCO <sub>2</sub> (mmHg)         | 37 (36 – 39)       | 40 (38 – 42)       | 38 (37 – 40)       |
| <b>EEO test</b>                  |                    |                    |                    |
| ICP (mmHg)                       | 5.8 (2.5 – 7.0)    | 8.2 (5.0 – 10.0)   | 5.8 (2.6 – 7.3)    |
| ICP change score (mmHg)          |                    | 2.6 (1.3 – 3.6)    | 0.1 (-0.2 – 0.4)   |
| ICP difference (mmHg)            |                    |                    | -0.1 (-0.4 – 0.2)  |
| CPP (mmHg)                       | 88 (80 – 90)       | 87 (80 – 90)       | 87 (78 – 92)       |
| CPP change score (mmHg)          |                    | -0.65 (-2.8 – 1.3) | -0.15 (-2.0 – 1.2) |
| CPP difference (mmHg)            |                    |                    | 0.2 (-1.2 – 2.0)   |
| Systolic blood pressure (mmHg)   | 131 (128 – 138)    | 137 (132 – 142)    | 132 (128 – 137)    |
| Mean blood pressure (mmHg)       | 91 (88 – 95)       | 94 (90 – 99)       | 93 (87 – 95)       |
| Diastolic blood pressure (mmHg)  | 72 (67 – 84)       | 73 (68 – 77)       | 72 (66 – 77)       |
| Heart rate (min <sup>-1</sup> )  | 66 (60 – 73)       | 65 (61 – 73)       | 66 (60 – 73)       |
| etCO <sub>2</sub> (mmHg)         | 37 (36 – 39)       | 41 (40 – 43)       | 38 (37 – 39)       |

Table S1: A comprehensive summary of the study results
